# Supplementary material for: Iron-core/carbon-shell nanoparticles with intrinsic peroxidase activity: new platform for mimetic glucose detection
Source: Royal Society of Chemistry journal article supplement (doi:10.1039/c7ay00598a), 2017-01-01
Supplement: c7ay00598a1.pdf [file c7ay00598a1.pdf]

## Supporting Information

### Iron- core/carbon-shell nanoparticles with intrinsic peroxidase

#### activity: new platform for mimetic glucose detection

N. S. Surgutskaya,<sup>a</sup> M. E. Trusova,<sup>a</sup> G. B. Slepchenko,<sup>b</sup> A. S. Minin,<sup>c</sup> A. G. Pershina,<sup>a,d</sup> M. A. Uimin,<sup>c</sup> A. E. Yermakov<sup>c</sup> and P. S. Postnikov<sup>e\*</sup>

<sup>a</sup>*Department of Biotechnology and Organic Chemistry, Tomsk Polytechnic University, Tomsk, 634050, Russia*

<sup>b</sup>*Department of Physical and Analytical Chemistry, Tomsk Polytechnic University, Tomsk, 634050, Russia*

<sup>c</sup>*Institute of Metal Physics, Ural Branch, Russian Academy of Science, Yecaterinburg, 620990, Russia*

<sup>d</sup>*Siberian State Medical University, Tomsk, 634050, Russia*

<sup>e</sup>*Department of Technology of Organic Substrates and Polymer Materials, Tomsk Polytechnic University, Tomsk, 634050, Russia e-mail: postnikov@tpu.ru*

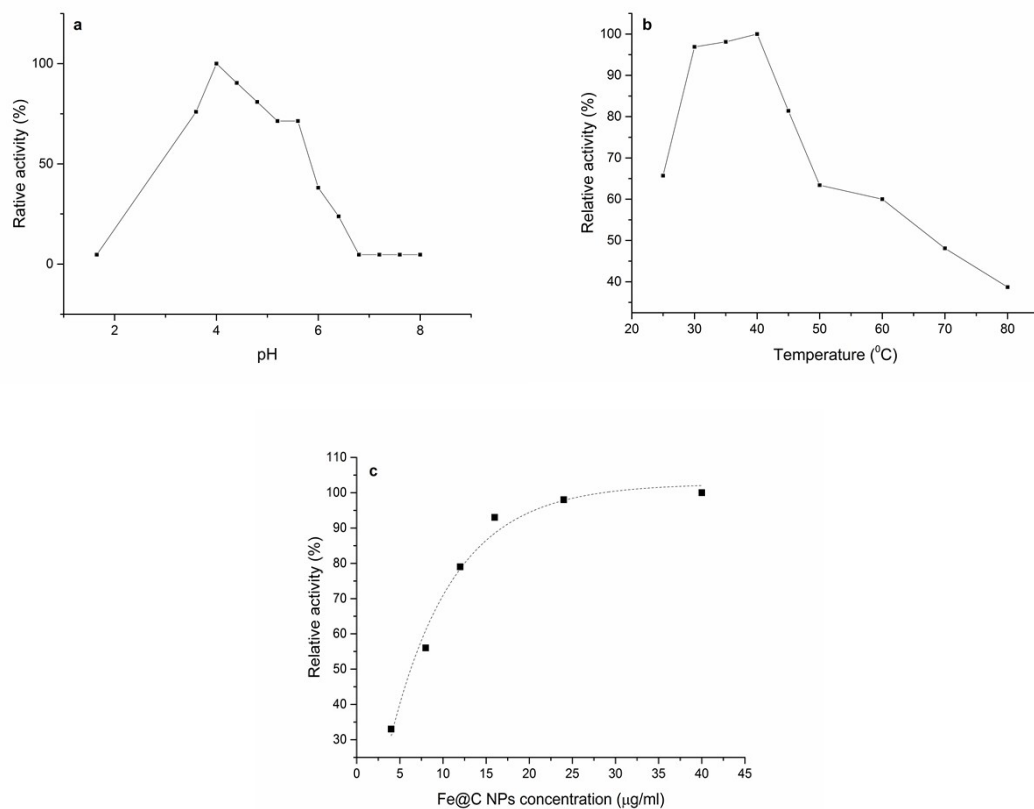

**Fig. S1** The peroxidase-like activity of Fe@C nanoparticles in dependence of pH (a), (b) temperature (600µL of 0.1 M NaOAc buffer (pH=3.6) containing 16 µg/ml Fe@C and 1 mM TMB as substrate) (c) Fe@C concentration (600 µL of 0.1 M NaOAc (pH=3,6) at 40 °C with 1 mM TMB as substrate).

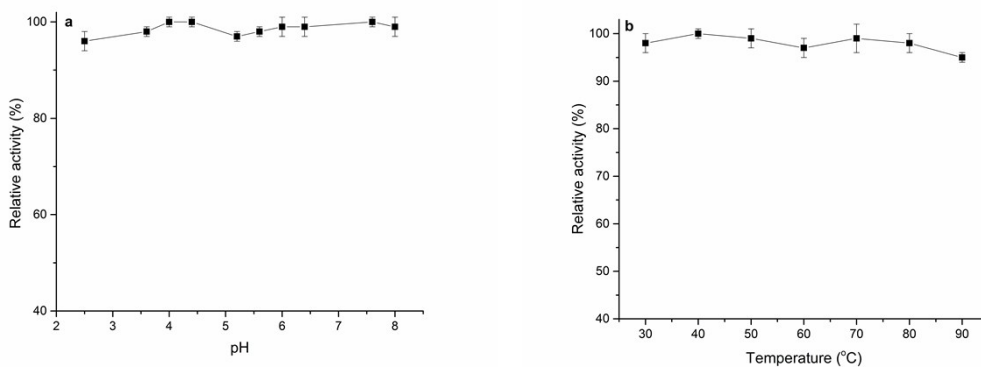

**Fig. S2** Dependence of peroxidase-like activity of Fe@C NPs after 2h incubation in solutions with different pH (a) and temperature (b). The relative activity of nanomaterial were measured after five-times washing with water in 600 of 0.1 M NaOAc (pH=3,6) at 40 °C with 1 mM TMB as substrate. Error bars represent the standard deviation of three measurements.

**Table S1** Comparison of the kinetic parameters of Fe@C nanoparticles, HRP and other nanomaterials.

| Substrate                     | Kinetic parameter                                 | PBMNPs               | Fe <sub>3</sub> O <sub>4</sub> | Fe@C                | C <sub>60</sub> [C(COOH) <sub>2</sub> ] <sub>2</sub> | HRP                   | Fe <sub>3</sub> O <sub>4</sub> @C |
|-------------------------------|---------------------------------------------------|----------------------|--------------------------------|---------------------|------------------------------------------------------|-----------------------|-----------------------------------|
| H <sub>2</sub> O <sub>2</sub> | K <sub>m</sub> (mM) <sup>a</sup>                  | 323,6                | 154,0                          | 114,4               | 24,58                                                | 3,70                  | 0,072                             |
|                               | V <sub>max</sub> (Ms <sup>-1</sup> ) <sup>b</sup> | 1,2*10 <sup>-6</sup> | 9,8*10 <sup>-8</sup>           | 35*10 <sup>-8</sup> | 0.347*10 <sup>-8</sup>                               | 8.71*10 <sup>-8</sup> | 18,0*10 <sup>-8</sup>             |
| TMB                           | K <sub>m</sub> (mM) <sup>a</sup>                  | 0,30                 | 0,098                          | 0,1                 | 0,23                                                 | 0,43                  | 0,38                              |
|                               | V <sub>max</sub> (Ms <sup>-1</sup> ) <sup>b</sup> | 1,1*10 <sup>-6</sup> | 3,4*10 <sup>-8</sup>           | 34*10 <sup>-8</sup> | 0.40*10 <sup>-8</sup>                                | 10*10 <sup>-8</sup>   | 74,0*10 <sup>-8</sup>             |
| <b>Ref.</b>                   |                                                   | [1]                  | [2]                            | This work           | [3]                                                  | [2]                   | [4]                               |

<sup>a</sup> Michaelis constant; <sup>b</sup> maximal reaction velocity

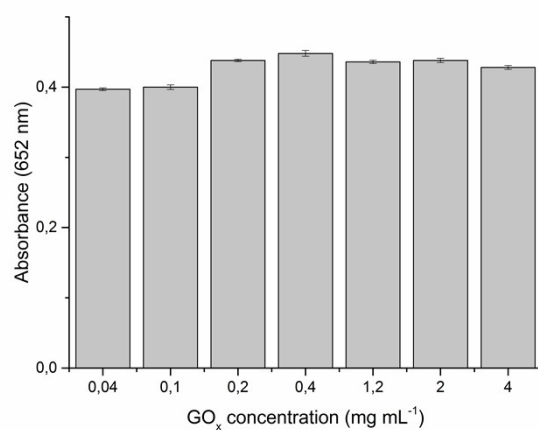

**Fig. S3** Absorbance at 652 nm of detection system in dependence of GOx concentration. Experiments were carried out with 1 mM glucose stock solution according to the two-step procedure. Error bars represent the standard deviation of three measurements.

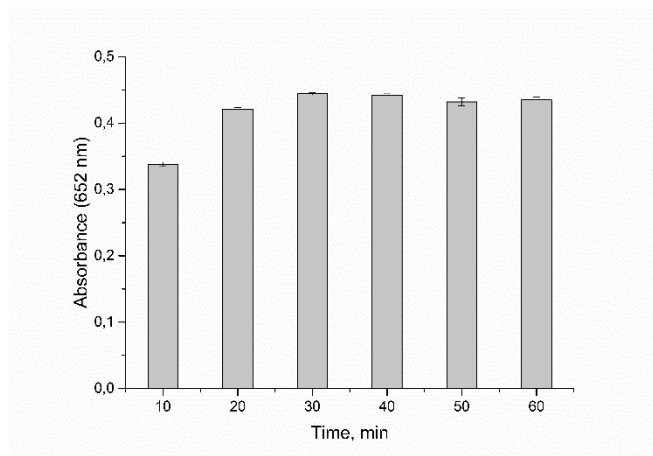

**Fig. S4** Absorbance at 652 nm of detection system in dependence of incubation time with GOx. Experiments were carried out with 1 mM glucose stock solution according to the two-step procedure. Error bars represent the standard deviation of three measurements.

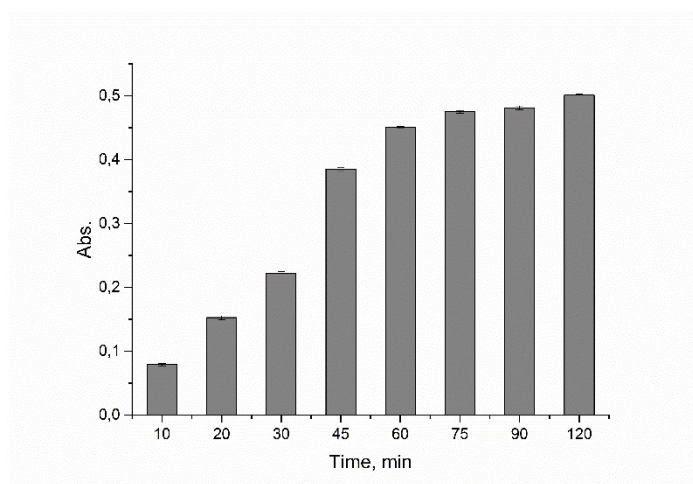

**Fig.S5** Dependence of absorbance of detection system at 652 nm in incubation time of the reaction mixtures with Fe@C. Experiments were carried out with 1 mM glucose stock solution according to the two-step procedure. Error bars represent the standard deviation of three measurements.

**Table S2** Comparison of colorimetric methods for glucose detection based on enzyme mimics of nanoparticles

| Nanomaterial                                    | Linear range ( $\mu\text{M}$ ) | LOD ( $\mu\text{M}$ ) | Ref.      |
|-------------------------------------------------|--------------------------------|-----------------------|-----------|
| $\text{C}_{60}[\text{C}(\text{COOH})_2]_2$      | 1-40                           | 0.5                   | [3]       |
| $\text{Fe}_3\text{O}_4@\text{C}$                | 6-100                          | 2                     | [5]       |
| $\text{Fe}_3\text{O}_4$ -porphyrin compositions | 25-50                          | 2.21                  | [6]       |
| Graphene oxide- $\text{Fe}_3\text{O}_4$         | 2-200                          | 0.74                  | [7]       |
| Nanoceria/DNA                                   | 1-200                          | 8.9                   | [8]       |
| $\text{Fe}@\text{C}$                            | 2.31-37.0                      | 0.21                  | This work |

### Glucose assay kit

For enzymatic glucose assay, juice samples were diluted 20 folds. Then, 10  $\mu\text{L}$  of diluted juice samples or 10  $\mu\text{L}$  standard glucose solution (10 mM) were added to 1 mL of the standard reagent solution contain GOx and HRP in PBS buffer. The resulting solutions were incubated at 37  $^\circ\text{C}$  for 10 min. Absorbance of each sample were measured at 652 nm. The glucose concentration (mM) of each sample was calculated by the equation:

$$C = \frac{E}{E_c} \cdot 10,$$

where  $E$  and  $E_c$  is the absorbance of measured sample and calibration standard solution respectively and 10 is the glucose concentration of standard solution.

**Table S3** Determination of glucose in juice samples

| Juice sample | Result in diluted Samples (6000) ( $\mu\text{M}$ ) | Added | Recovery (%) | RSD (n=5) % | Experimental Result (mM) | Glucose assay kit (mM) |
|--------------|----------------------------------------------------|-------|--------------|-------------|--------------------------|------------------------|
| Banana       | 19,66                                              |       |              | 1.21        | 117.96 $\pm$ 1.24        | 119.70 $\pm$ 0.74      |
| Apple        | 21,54                                              |       |              | 1.74        | 129.19 $\pm$ 1.96        | 128.34 $\pm$ 0.50      |
| Pea          | 16,98                                              | 5     | 96.8         | 2.06        | 101.95 $\pm$ 1.79        | 99.18 $\pm$ 1.17       |
|              |                                                    | 10    | 94.7         |             |                          |                        |
|              |                                                    | 15    | 97.2         |             |                          |                        |
|              |                                                    | 20    | 98.0         |             |                          |                        |
| Strawberry   | 33,21                                              |       |              | 3.20        | 199.67 $\pm$ 5.56        | 199.65 $\pm$ 1.40      |
| Pomegranate  | 34,12                                              |       |              | 0.97        | 204.71 $\pm$ 1.74        | 203.41 $\pm$ 1.65      |

## References

1. X. Zhang, S. Gong, Y. Zhang, T. Yang, C. Wang and N. Gu, *J. Mater. Chem.*, 2010, 20, 5110-5116.
2. L. Gao, J. Zhuang, L. Nie, J. Zhang, Y. Zhang, N. Gu, T. Wang, J. Feng, D. Yang, S. Perrett and X. Yan, *Nature Nanotechnology*, 2007, 2, 577-583.
3. R. Li, M. Zhen, M. Guan, D. Chen, G. Zhang, J. Ge, P. Gong, C. Wang and C. Shu, *Biosensors and Bioelectronics*, 2013, 47, 502-507.
4. Q. An, C. Sun, D. Li, K. Xu, J. Guo and C. Wang, *ACS Appl. Mater. Interfaces*, 2013, 5, 13248-13257.
5. Q. Li, G. Tang, X. Xiong, Y. Cao, L. Chen, F. Xu and H. Tan, *Sensors and Actuators B*, 2015, 215, 86-92.
6. Q. Liu, H. Li, Q. Zhao, R. Zhu, Y. Yang, Q. Jia, B. Bian, L. Zhuo, *Materials Science and Engineering: C*, 2014, 41, 142-151.
7. Y. Dong, H. Zhang, Z.U. Rahman, L. Su, X. Chen, J. Hu, X. Chen, *Nanoscale*, 2012, 4, 3969-3976.
8. B. Liu, Z. Sun, P.J. Huang and J. Liu, *J. Am. Chem. Soc.*, 2015, 137, 1290-1295.
